# Supplementary material
Source: Elsevier journal article supplement (https://www.sciencedirect.com/science/article/pii/S2173572722003289)
Supplement: mmc1 [file S2173572722003289:mmc1.pdf]

## Development of pectoral muscle atrophy in critically ill patients.

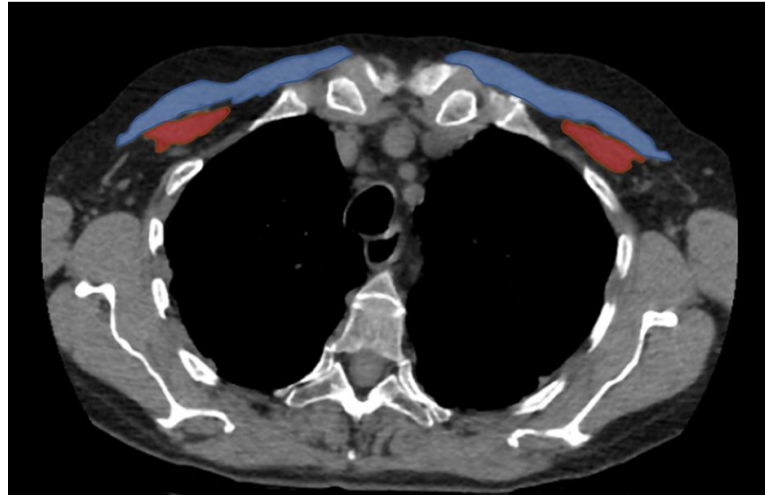

**Supplementary Figure 1.** Sample computed tomography scan used for measurement of major (blue) and minor (red) pectoral muscles' area.

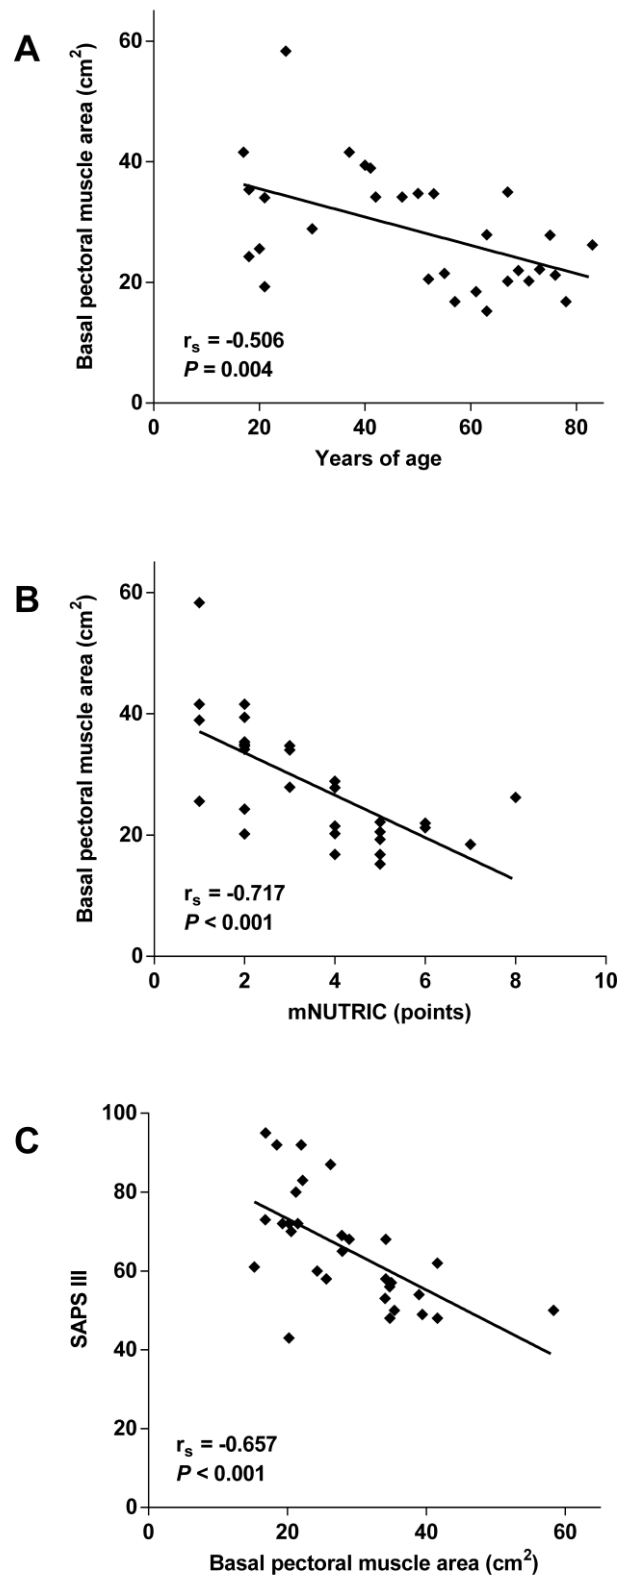

**Supplementary Figure 2.** Bivariate correlation between pectoral muscle area on admission and patients' age (A), mNUTRIC score (B) or SAPS III (C).
